# Supplementary material for: Immune thrombocytopenia and pregnancy: an exposed/nonexposed cohort study
Source: PubMed Central journal article supplement — Blood. 2022 Sep 5;141(1):11–21. doi: 10.1182/blood.2022017277 (PMC10644036; doi:10.1182/blood.2022017277), 2022-09-05
Supplement: BLOOD_BLD-2022-017277-mmc1.pdf [file BLOOD_BLD-2022-017277-mmc1.pdf]

**Supplemental Tables:**

| <b>Age*</b>       |   |
|-------------------|---|
| Age over 65 years | 2 |
| Age over 75 years | 5 |

  

| <b>Cutaneous bleeding*</b>                             |   |
|--------------------------------------------------------|---|
| Localized petechial purpura (legs)                     | 1 |
| Localized ecchymotic purpura                           | 2 |
| Two locations of petechial purpura (e.g. legs + chest) | 2 |
| Generalized petechial purpura                          | 3 |
| Generalized ecchymotic purpura                         | 4 |

  

| <b>Mucosal bleeding*</b>                                       |   |
|----------------------------------------------------------------|---|
| Unilateral epistaxis                                           | 2 |
| Bilateral epistaxis                                            | 3 |
| Hemorrhagic oral bullae, spontaneous gingival bleeding or both | 5 |

  

| <b>Gastrointestinal bleeding*</b>                                                    |    |
|--------------------------------------------------------------------------------------|----|
| Gastrointestinal hemorrhage without anemia                                           | 4  |
| Gastrointestinal hemorrhage with acute anemia (> 2g Hb decrease in 24h) and/or shock | 15 |

  

| <b>Urinary bleeding*</b>                |    |
|-----------------------------------------|----|
| Macroscopic hematuria without anemia    | 4  |
| Macroscopic hematuria with acute anemia | 10 |

  

| <b>Genitourinary tract bleeding*</b>      |    |
|-------------------------------------------|----|
| Major meno/metrorrhagia without anemia    | 4  |
| Major meno/metrorrhagia with acute anemia | 10 |

  

| <b>Central nervous system bleeding</b>                             |    |
|--------------------------------------------------------------------|----|
| Central nervous system bleeding and/or life-threatening hemorrhage | 15 |

**Table S1. Bleeding score**

\* For these items, only the highest value was taken into account.

For this study, the age parameter was not taken into account because all women were of childbearing age.

| Centers/Year of inclusion | 2013 | 2014 | 2015 | 2016 | 2017 | 2018 | Total |
|---------------------------|------|------|------|------|------|------|-------|
| 1                         | 5    | 18   | 4    | 13   | 2    | 0    | 42    |
| 2                         | 3    | 4    | 4    | 1    | 0    | 0    | 12    |
| 3                         | 0    | 0    | 0    | 0    | 1    | 1    | 2     |
| 4                         | 0    | 0    | 1    | 2    | 0    | 0    | 3     |
| 5                         | 3    | 4    | 3    | 3    | 4    | 0    | 17    |
| 6                         | 0    | 4    | 6    | 15   | 1    | 0    | 26    |
| 7                         | 0    | 0    | 3    | 10   | 5    | 0    | 18    |
| 8                         | 0    | 1    | 0    | 1    | 0    | 0    | 2     |
| 9                         | 0    | 1    | 0    | 0    | 0    | 0    | 1     |
| 10                        | 0    | 1    | 1    | 0    | 0    | 0    | 2     |
| 11                        | 1    | 3    | 1    | 1    | 0    | 0    | 6     |
| 12                        | 0    | 6    | 0    | 1    | 0    | 2    | 9     |
| 13                        | 1    | 5    | 2    | 0    | 0    | 0    | 8     |
| 14                        | 3    | 4    | 3    | 1    | 2    | 0    | 13    |
| 15                        | 1    | 0    | 2    | 4    | 0    | 0    | 7     |
| 16                        | 1    | 2    | 2    | 4    | 0    | 1    | 10    |
| 17                        | 0    | 6    | 6    | 1    | 4    | 6    | 23    |
| 18                        | 3    | 5    | 1    | 0    | 0    | 0    | 9     |
| 19                        | 5    | 7    | 1    | 6    | 4    | 0    | 23    |
| 20                        | 1    | 18   | 7    | 0    | 5    | 0    | 31    |
| 21                        | 2    | 0    | 0    | 0    | 0    | 0    | 2     |
| 22                        | 1    | 0    | 0    | 0    | 0    | 0    | 1     |
| 23                        | 0    | 1    | 0    | 1    | 0    | 0    | 2     |
| 24                        | 2    | 2    | 1    | 0    | 0    | 0    | 5     |
| 25                        | 0    | 1    | 0    | 1    | 2    | 1    | 5     |
| 26                        | 0    | 6    | 0    | 4    | 6    | 0    | 16    |
| 27                        | 0    | 0    | 2    | 6    | 2    | 9    | 19    |
| 28                        | 0    | 0    | 1    | 1    | 2    | 0    | 4     |
| 29                        | 0    | 0    | 0    | 3    | 1    | 0    | 4     |
| 30                        | 0    | 0    | 2    | 1    | 0    | 0    | 3     |
| 31                        | 0    | 0    | 0    | 1    | 15   | 3    | 19    |
| 32                        | 0    | 0    | 0    | 0    | 4    | 0    | 4     |
| Total                     | 32   | 99   | 53   | 81   | 59   | 23   | 348   |

**Table S2. Detail number of inclusions per centers and per years.**

|                                                                                   | Neonatal thrombocytopenia (platelet count < 30 x 10 <sup>9</sup> /L) |            |            | Univariable analysis           |         | Multivariable analysis       |         |
|-----------------------------------------------------------------------------------|----------------------------------------------------------------------|------------|------------|--------------------------------|---------|------------------------------|---------|
|                                                                                   | Total (n=136)                                                        | No (n=123) | Yes (n=13) | Unadjusted odds ratio [95% CI] | p-Value | Adjusted odds ratio [95% CI] | p-Value |
| Maternal platelet count at delivery < 50 x 10 <sup>9</sup> /L (n=127/115/12)      | 8 (6.3)                                                              | 6 (5.2)    | 2 (16.7)   | 3.63 [0.65-20.42]              | 0.16    |                              |         |
| Maternal platelet count < 50 x 10 <sup>9</sup> /L within 3 months before delivery | 44 (32.4)                                                            | 35 (28.5)  | 9 (69.2)   | 5.66 [1.64-19.57]              | 0.005   | 6.15 [1.72-21.95]            | 0.005   |
| Disease status at pregnancy diagnosis                                             |                                                                      |            |            |                                | 0.1     |                              |         |
| CR                                                                                | 62 (45.6)                                                            | 59 (48.0)  | 3 (23.1)   | 1 (ref)                        |         |                              |         |
| R                                                                                 | 59 (43.4)                                                            | 52 (42.3)  | 7 (53.8)   | 2.65 [0.65-10.77]              |         |                              |         |
| NR                                                                                | 15 (11.0)                                                            | 12 (9.7)   | 3 (23.1)   | 4.92 [0.88-27.36]              |         |                              |         |
| Disease status worsening between M0 and M9                                        | 65 (47.8)                                                            | 55 (44.7)  | 10 (68.4)  | 4.12 [1.08-15.71]              | 0.03    |                              |         |
| Previous history of neonatal thrombocytopenia                                     | 20 (14.7)                                                            | 16 (13.0)  | 4 (30.8)   | 2.97 [0.82-10.79]              | 0.10    | 3.33 [0.84-13.24]            | 0.088   |
| Previous Splenectomy                                                              | 16 (11.8)                                                            | 13 (10.6)  | 3 (23.1)   | 2.54 [0.62-10.42]              | 0.18    |                              |         |
| Treatment to prepare delivery IVIg and/or CT                                      | 58 (42.7)                                                            | 49 (39.8)  | 9 (69.2)   | 3.40 [0.99-11.65]              | 0.07    |                              |         |

**Table S3. Factors associated with neonatal thrombocytopenia < 30 x 10<sup>9</sup>/L in 171 newborns.**

The results are given as number of events (%).

\* Chi2 test or Fisher exact test.

\*\* Multivariable logistic regression model, adjusted only on significant values in multivariable analysis.

CR, complete response; NR, non-response; R, response; CI, confidence interval; CT, corticosteroids; IVIg, intravenous Immunoglobulin.

**Supplemental Figure:**

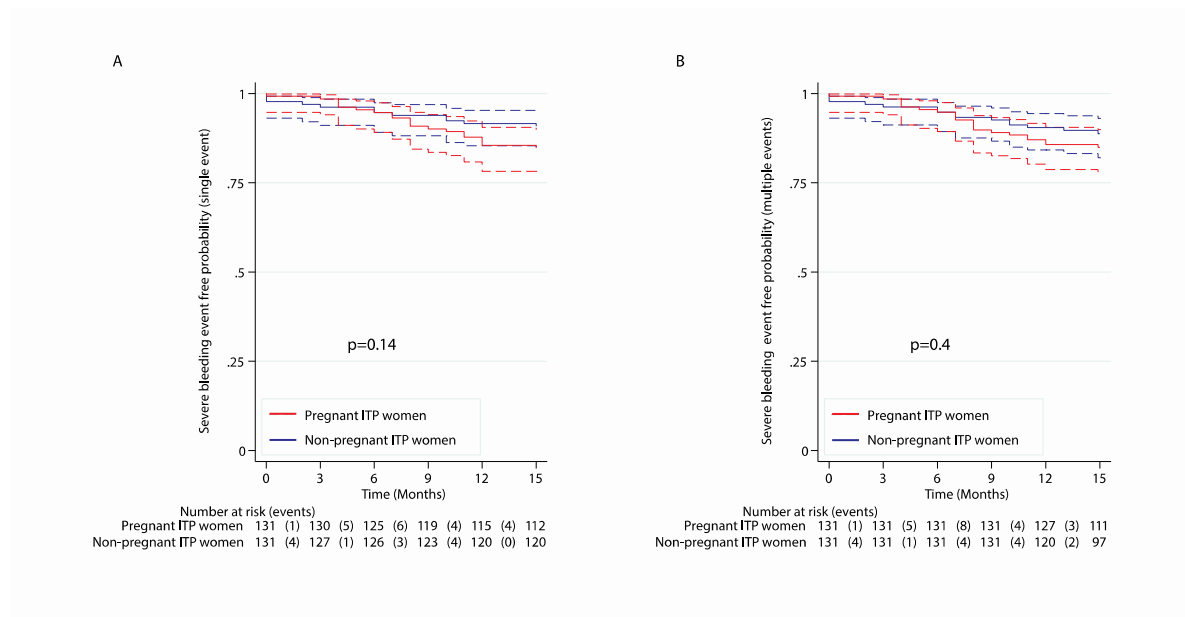

**Figure S1. Severe bleeding events among matched pregnant and non-pregnant ITP women.**

**A First event**

The cumulative incidence (and 95% confidence interval) proportion of patients experiencing a first event of severe bleeding was estimated with the Kaplan-Meier method and compared in the two groups with use of a Cox model with shared frailty.

**B multiples events**

Recurrence of severe bleeding events (and 95% confidence interval) was estimated with the Kaplan-Meier method and compared in the two groups with the use of an Anderson-Gill Cox model.
